# Supplementary material for: Manifestations of Liver Impairment and the Effects of MH-76, a Non-Quinazoline α1-Adrenoceptor Antagonist, and Prazosin on Liver Tissue in Fructose-Induced Metabolic Syndrome
Source: MDPI journal article supplement (doi:10.3390/metabo13111130), 2023-11-03
Supplement: s1 [file s1]

## Supplementary materials

**Table S1.** Systolic blood pressure and fasting glycemia at the week 12 in fructose-fed rats.

|                   | Systolic blood pressure<br>(mmHg) | Fasting glycemia<br>(mg/dl) |
|-------------------|-----------------------------------|-----------------------------|
| Control           | 122.3 ± 3.5                       | 79.0 ± 7.9                  |
| Fructose          | 138.4 ± 10.2 ***                  | 100.8 ± 10.7 *              |
| Fructose+MH-76    | 139.3 ± 8.3 ***                   | 98.1 ± 7.6*                 |
| Fructose+Prazosin | 135.6 ± 3.2 **                    | 100.3 ± 20.8*               |

Data are presented as means ± SD, n = 7-8, \*p < 0.05, \*\*p < 0.01, \*\*\*p < 0.001 vs Control, One-way ANOVA, post hoc Tukey test.

**Table S2.** Selected components of the metabolic syndrome of Control, Fructose, Fructose+MH-76, and Fructose+Prazosin- treated rats at the end of experimental period (week 18)

|                   | Abdominal fat<br>weight<br>(mg/g body wt) | Systolic<br>blood<br>pressure<br>(mmHg) | Fasting<br>glycemia<br>(mg/dl) | HOMA-IR     | Fasting<br>triglycerides<br>(mmol/l) |
|-------------------|-------------------------------------------|-----------------------------------------|--------------------------------|-------------|--------------------------------------|
| Control           | 41.1 ± 5.0                                | 119.4 ± 2.9                             | 100.8 ± 10.3                   | 1.75 ± 0.5  | 1.9 ± 0.5                            |
| Fructose          | 58.9 ± 6.4***                             | 137.9 ± 5.6**                           | 132.3 ± 8.4***                 | 5.3 ± 3.9*  | 3.7 ± 0.8***                         |
| Fructose+MH-76    | 36.2 ± 6.8###                             | 120.8 ± 17.4#                           | 89.5 ± 16.8####                | 1.6 ± 0.6#  | 1.9 ± 0.5###                         |
| Fructose+Prazosin | 57.7 ± 9.0***                             | 115.4 ± 10.6###                         | 107.1 ± 13.5##                 | 6.5 ± 2.0** | 2.6 ± 1.1                            |

Data are presented as means ± SD, n = 7-8, \*p < 0.05, \*\*p < 0.01, \*\*\*p < 0.001, \*\*\*\*p < 0.0001 vs Control, #p < 0.05, ##p < 0.01, ###p < 0.001, ####p < 0.0001 versus Fructose, One-way ANOVA, post hoc Tukey test.

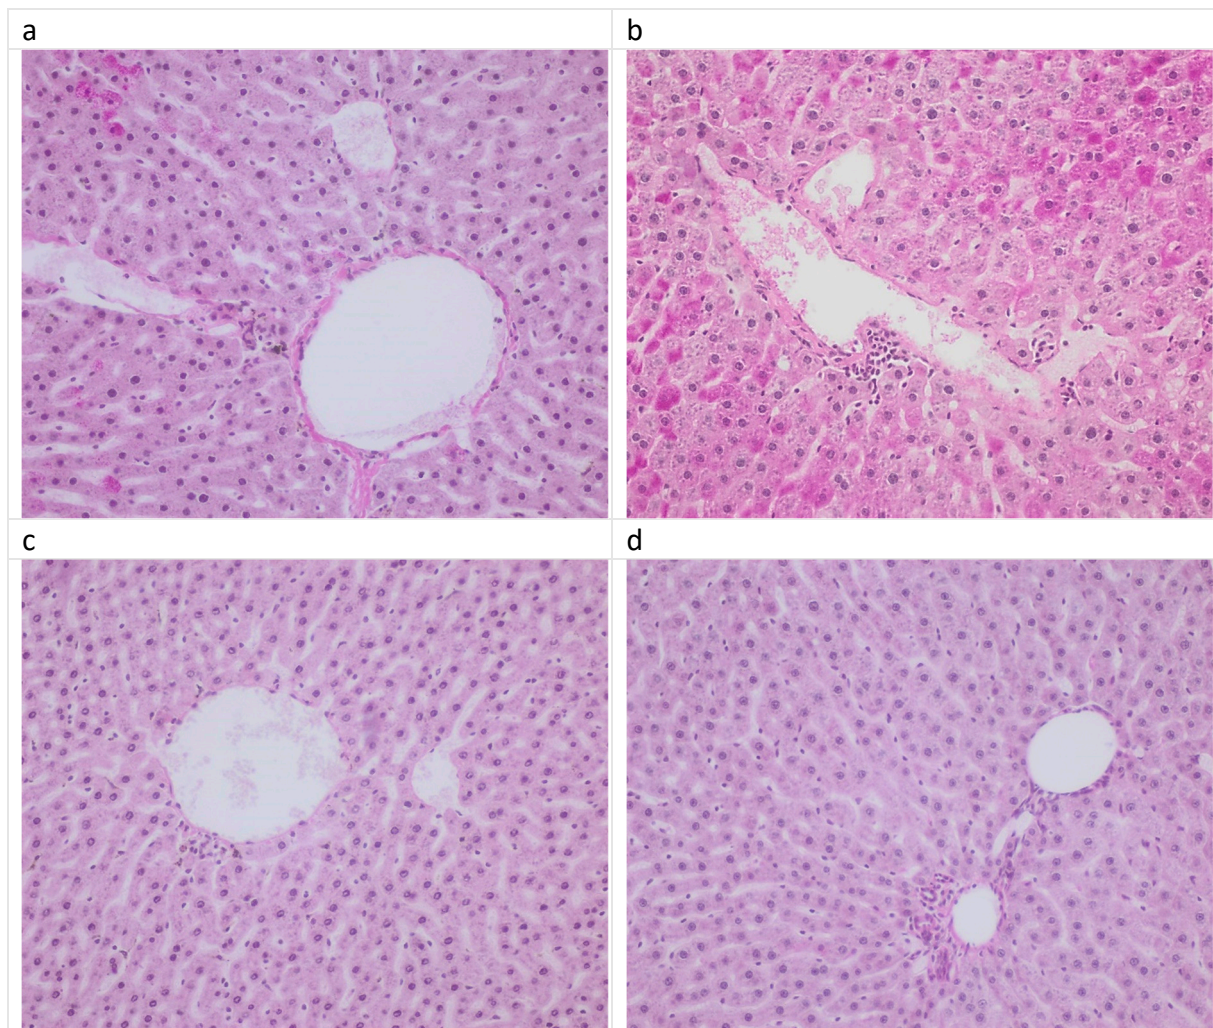

**Figure S1.** Lobular structure regularity and sinusoidal irregularity; **(a)** Control group, **(b)** Fructose, **(c)** Fructose+MH-76, **(d)** Fructose+Prazosin. H-E staining; Original magnification: objective 40x.

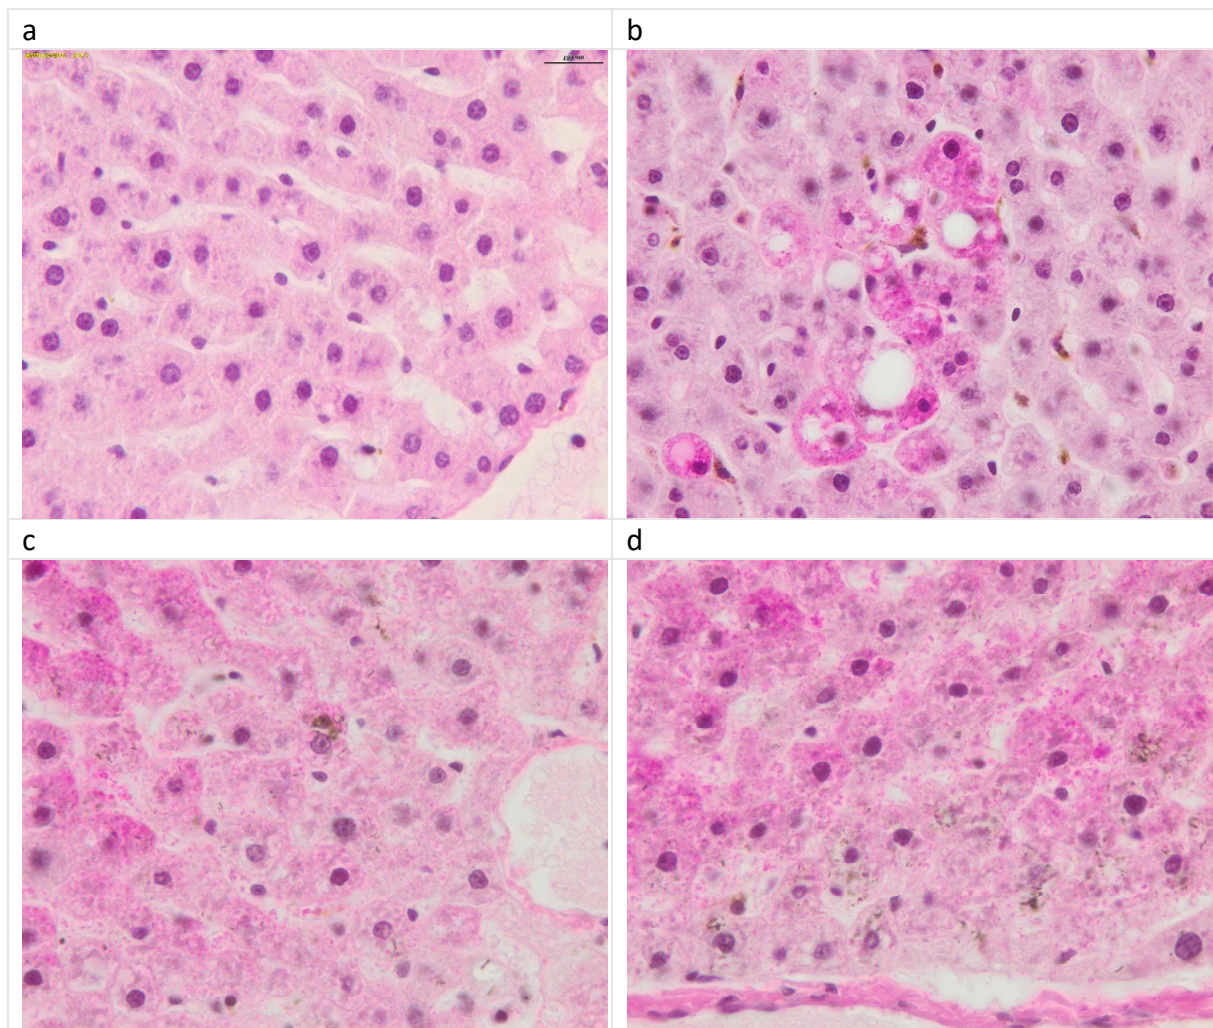

**Figure S2.** Fructose group: occasional focal inflammation with ballooning and necrotic cells, and Mallory-Denk bodies in comparison to other groups; **(a)** Control group, **(b)** Fructose, **(c)** Fructose+MH-76, **(d)** Fructose+Prazosin. H-E staining; Original magnification: objective 100x.



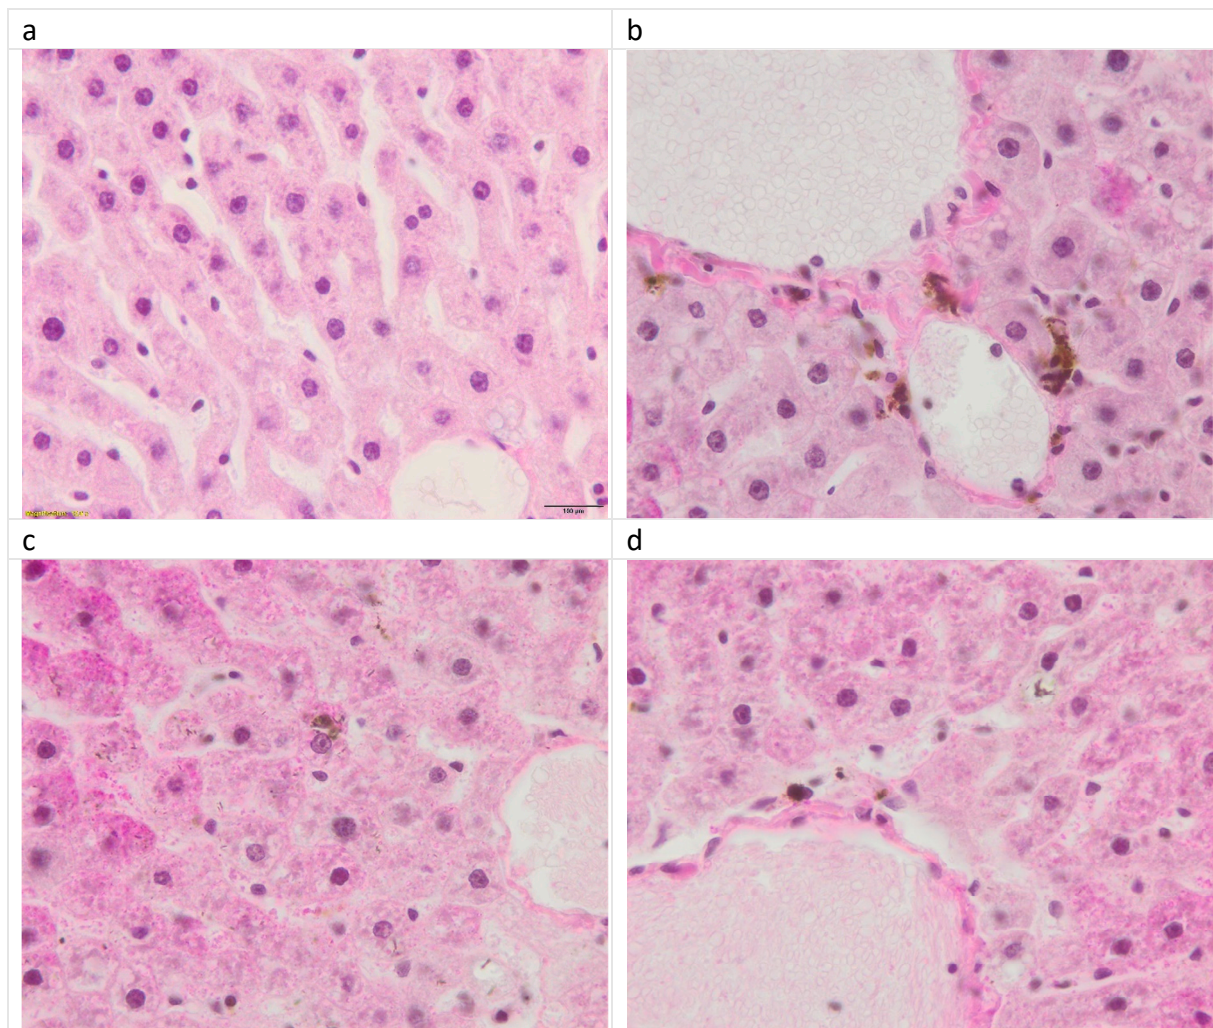

**Figure S3.** Kupfer cell accumulation in Fructose group in comparison to other groups; **(a)** Control group, **(b)** Fructose, **(c)** Fructose+MH-76, **(d)** Fructose+Prazosin. H-E staining; Original magnification: objective 100x.

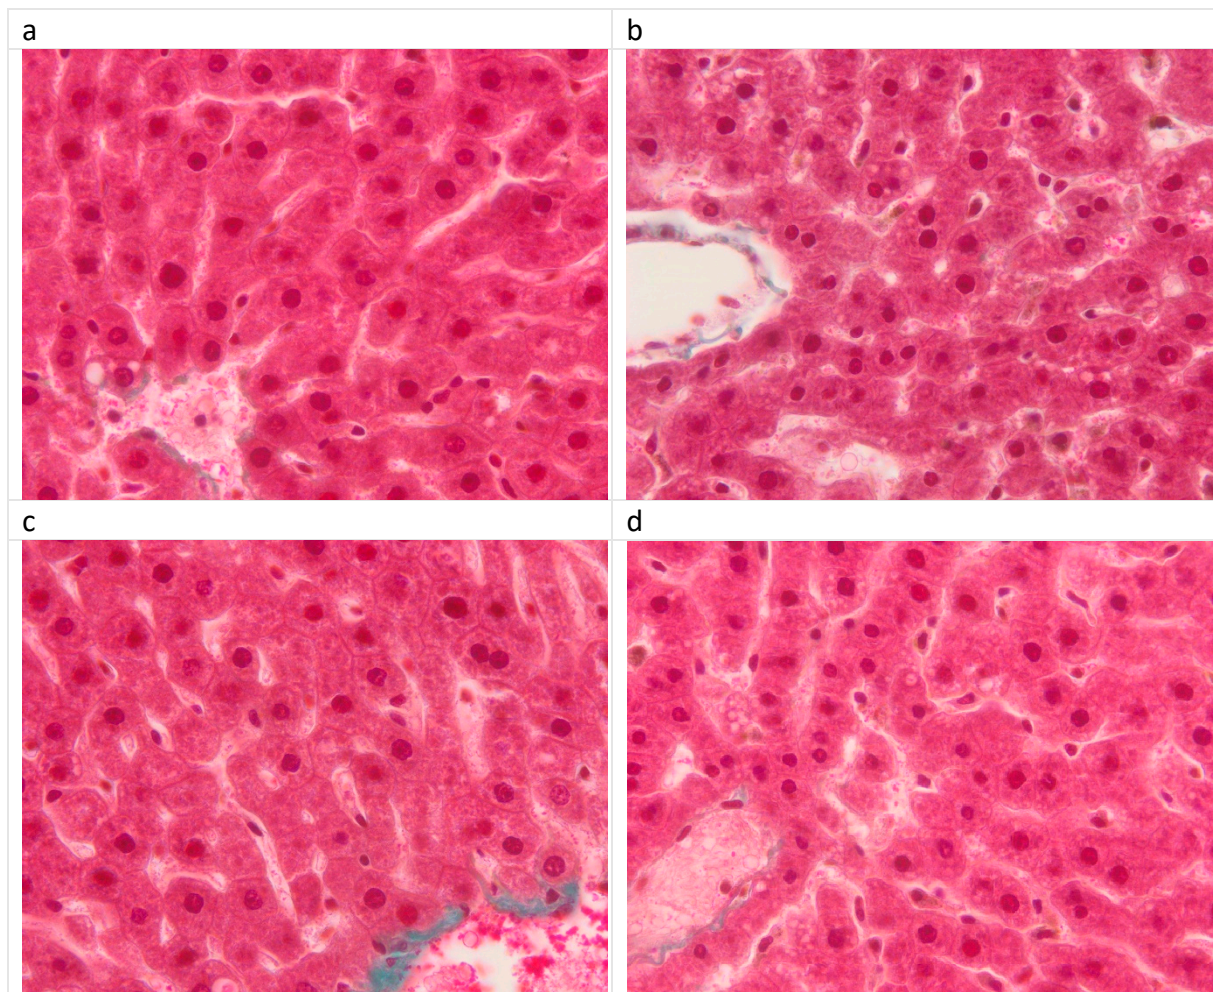

**Figure S4.** Micro- and macrosteatosis in Fructose group in comparison to other groups; **(a)** Control group, **(b)** Fructose, **(c)** Fructose+MH-76, **(d)** Fructose+Prazosin. H-E staining; Original magnification: objective 100x.



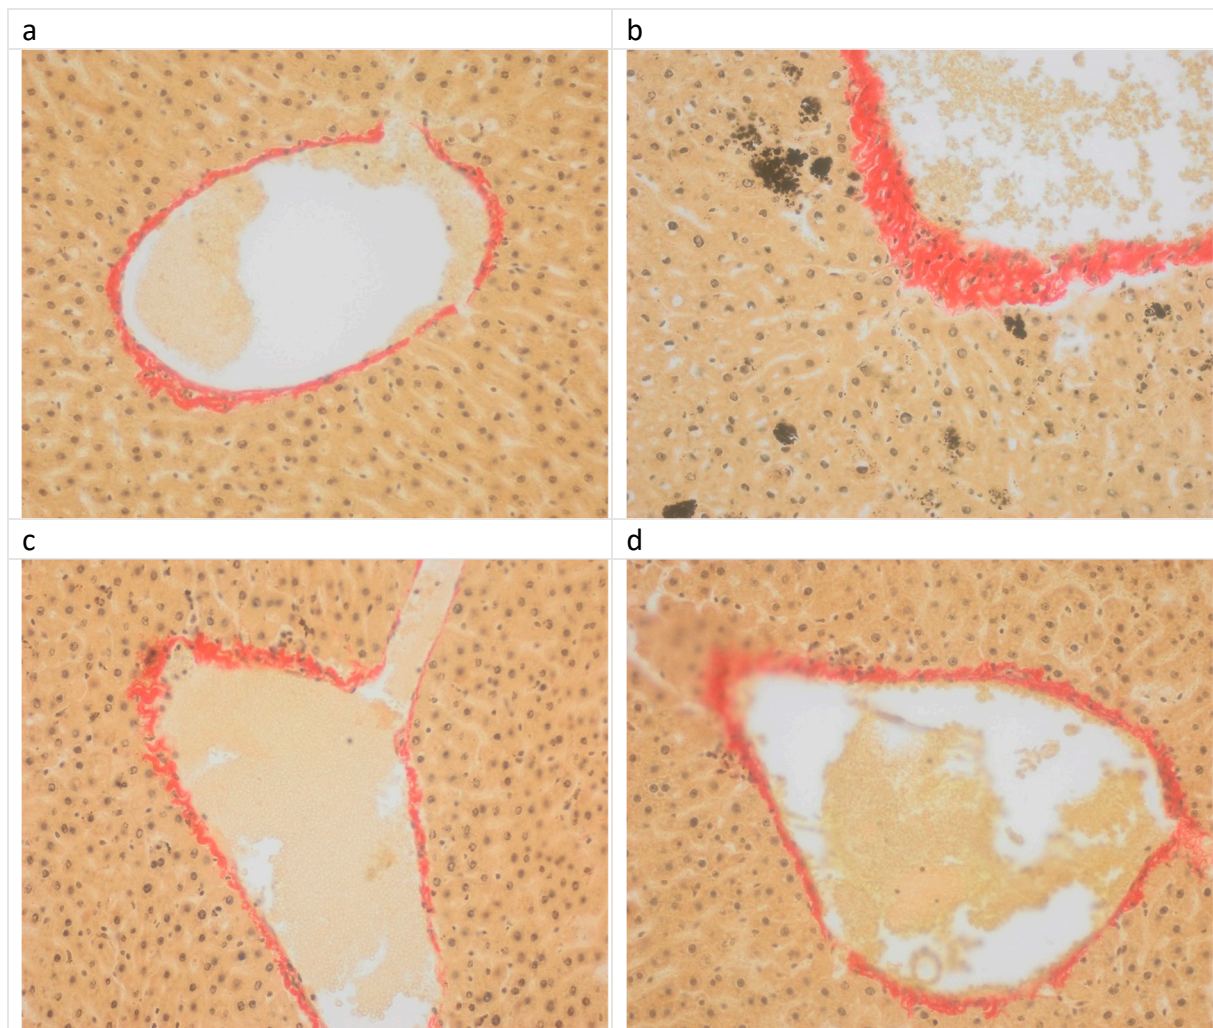

**Figure S5.** Pigment deposits within hepatocytes clustered near central vein (but occasionally has a panlobular distribution) and within Kupffer cells in sinusoids (here less conspicuous) in Fructose group in comparison to other groups; **(a)** Control group, **(b)** Fructose, **(c)** Fructose+MH-76, **(d)** Fructose+Prazosin. H-E staining; Original magnification: objective 100x.
